# Supplementary material
Source: PubMed Central journal article supplement (PMC2861775)
Supplement: NIHMS135513-supplement-SF1-8.pdf [file NIHMS135513-supplement-SF1-8.pdf]

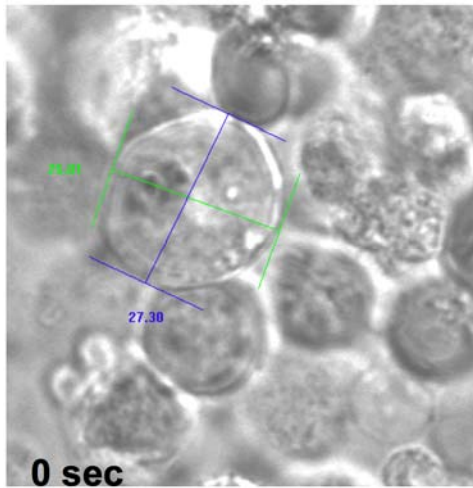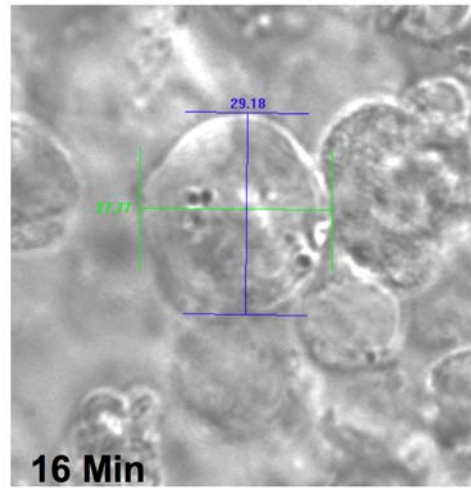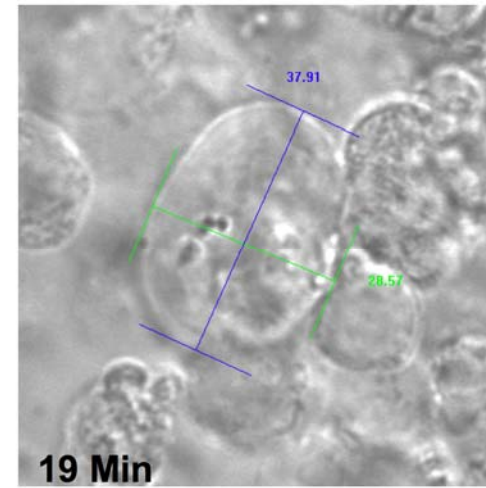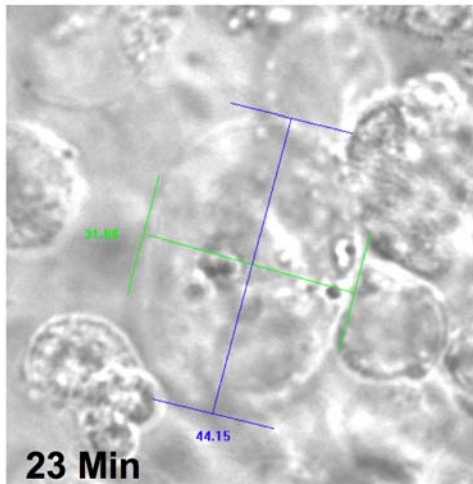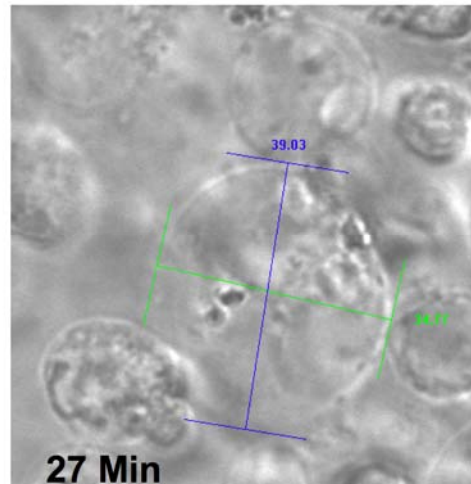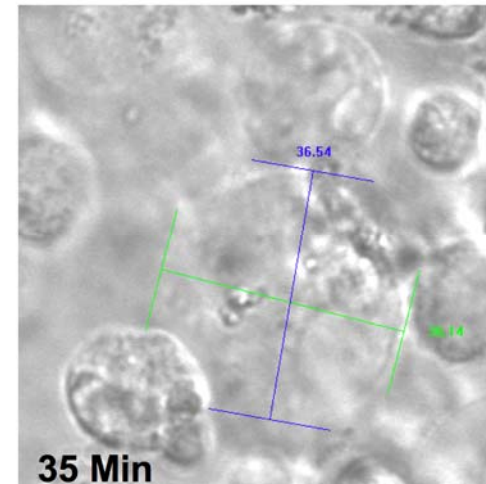

### **SF1. MK cell size measurement during endomitosis.**

Size measurements in micrometers of the low ploidy MK (tetraploid) depicted in Figure 2A-i were obtained at various time points using the calipers tools of Metamorph software. Original magnification 900X.

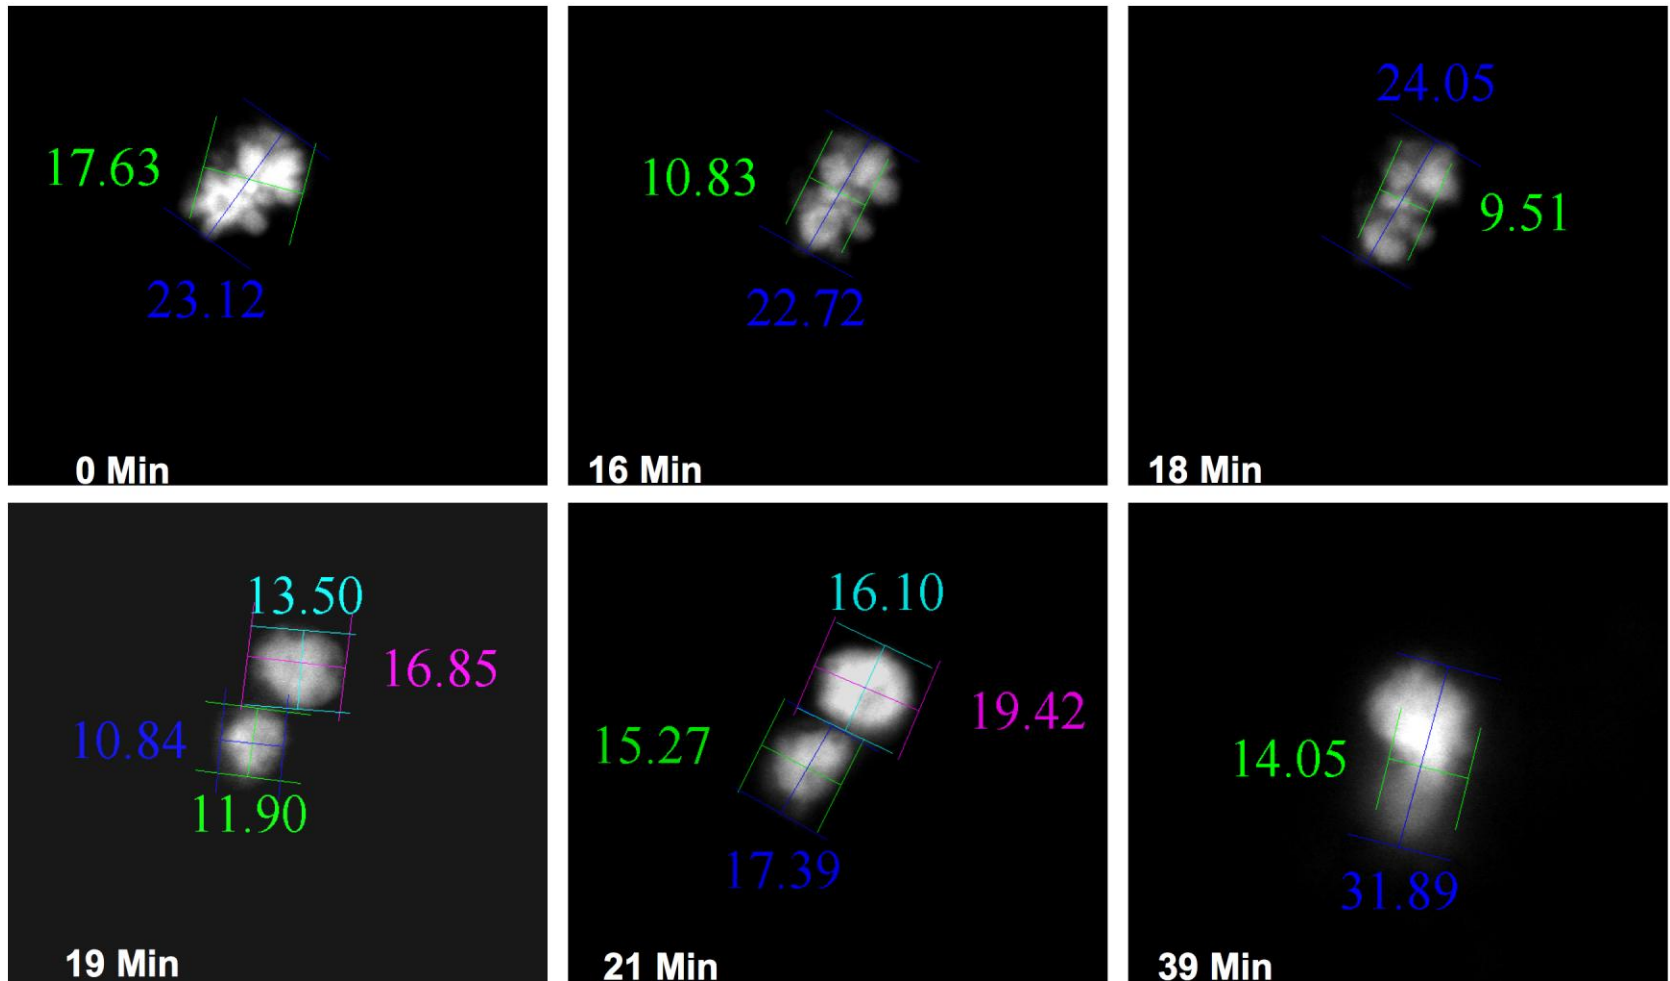

**SF2. Changes in chromosomal measurements during endomitosis.**

Size measurements of chromosomal content (in micrometers) of the low ploidy MK (tetraploid) depicted in Figure 2A-i were obtained at various time points using the calipers tools of Metamorph software. Original magnification 900X.

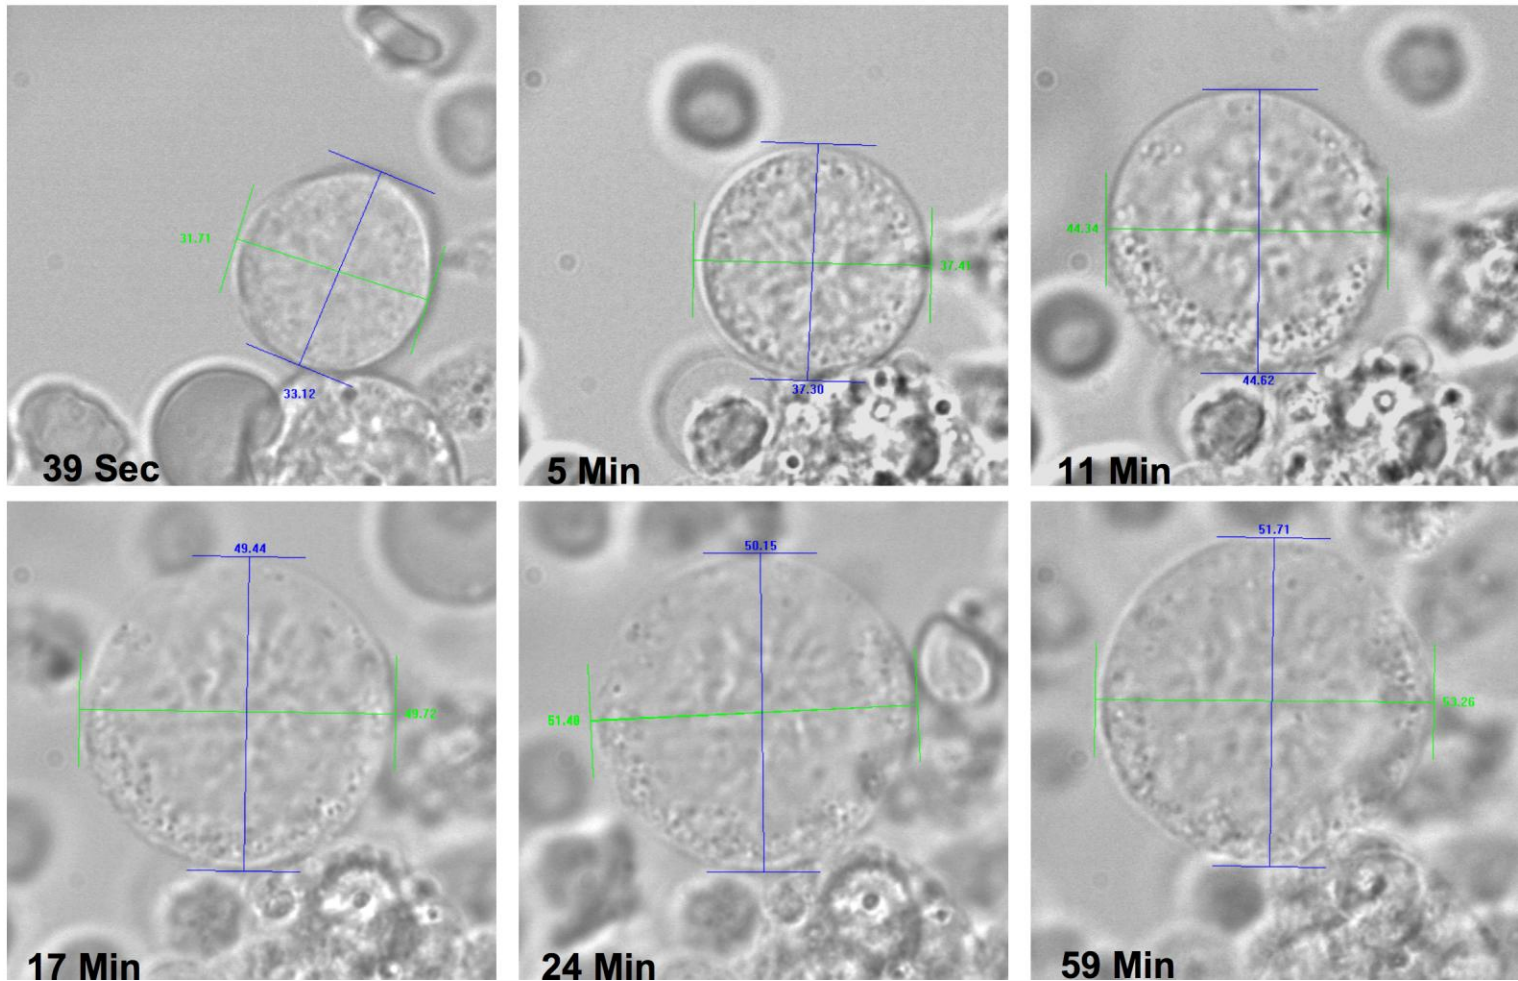

**SF3. MK cell size measurement during endomitosis.**

Size measurements in micrometers of the high ploidy MK (16N) depicted in Figure 2B-i were obtained at various time points using the calipers tools of Metamorph software. Original magnification 900X.

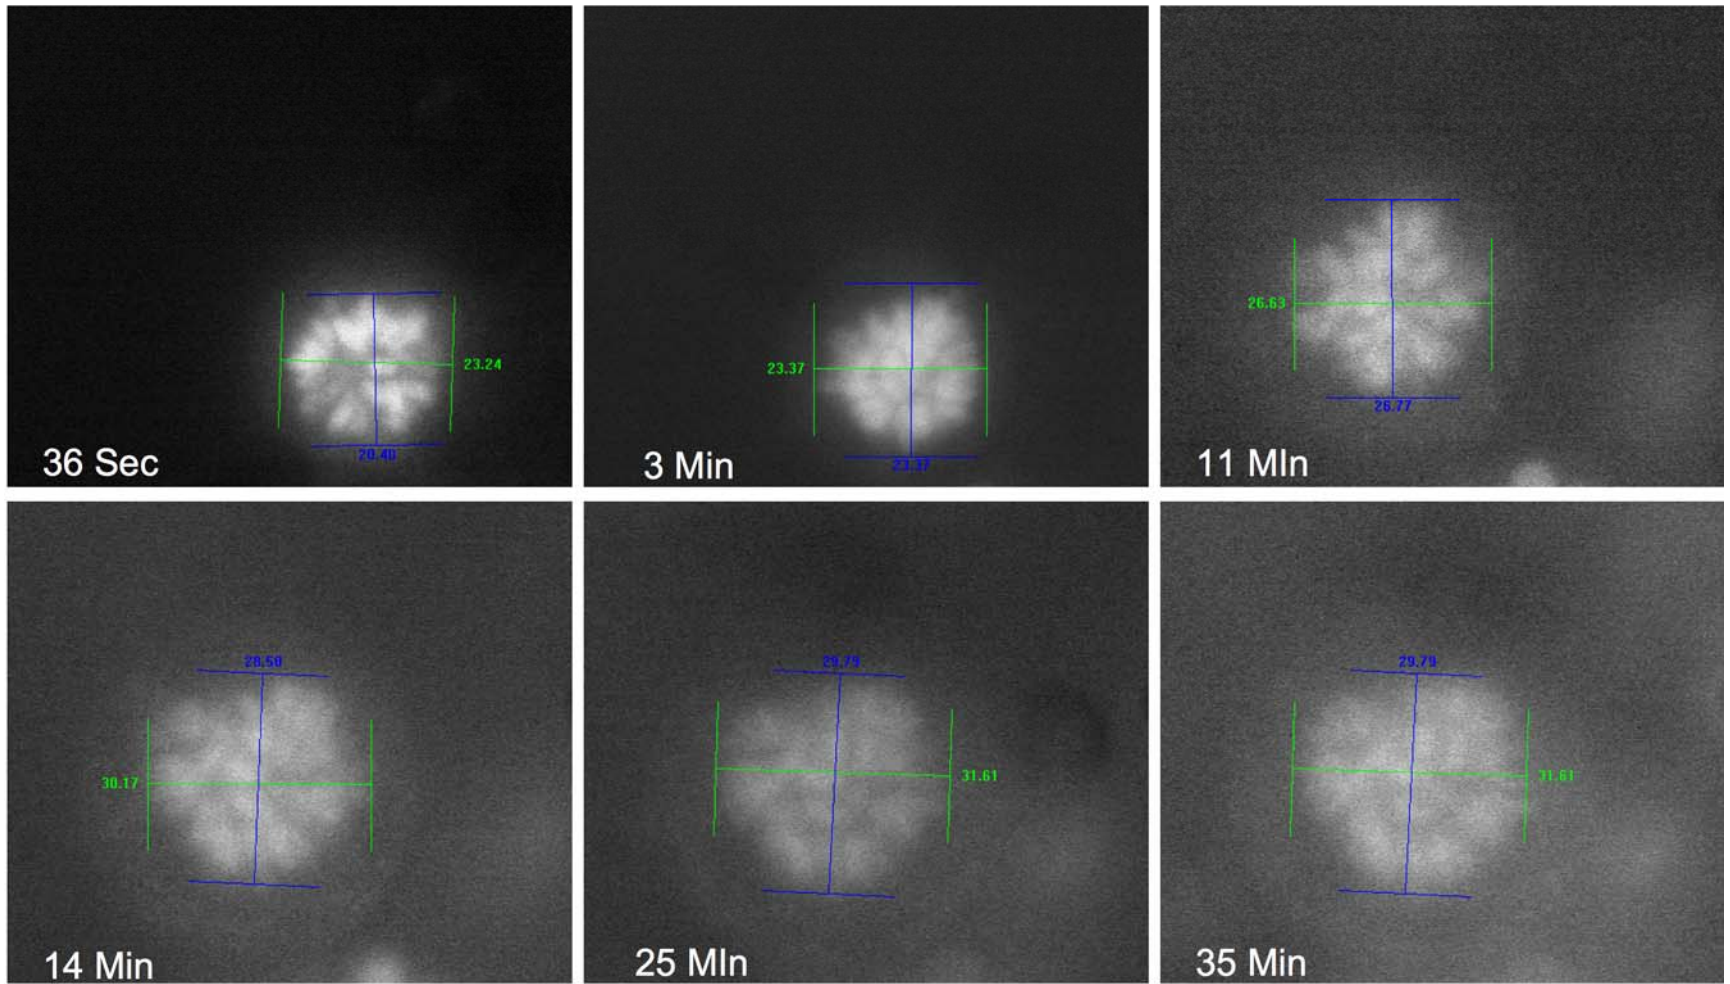

**SF4. Changes in chromosomal measurements during endomitosis.**

Size measurements of chromosomal content (in micrometers) of the high ploidy MK (16N) depicted in Figure 2B-i were obtained at various time points using the calipers tools of Metamorph software. Original magnification 900X.

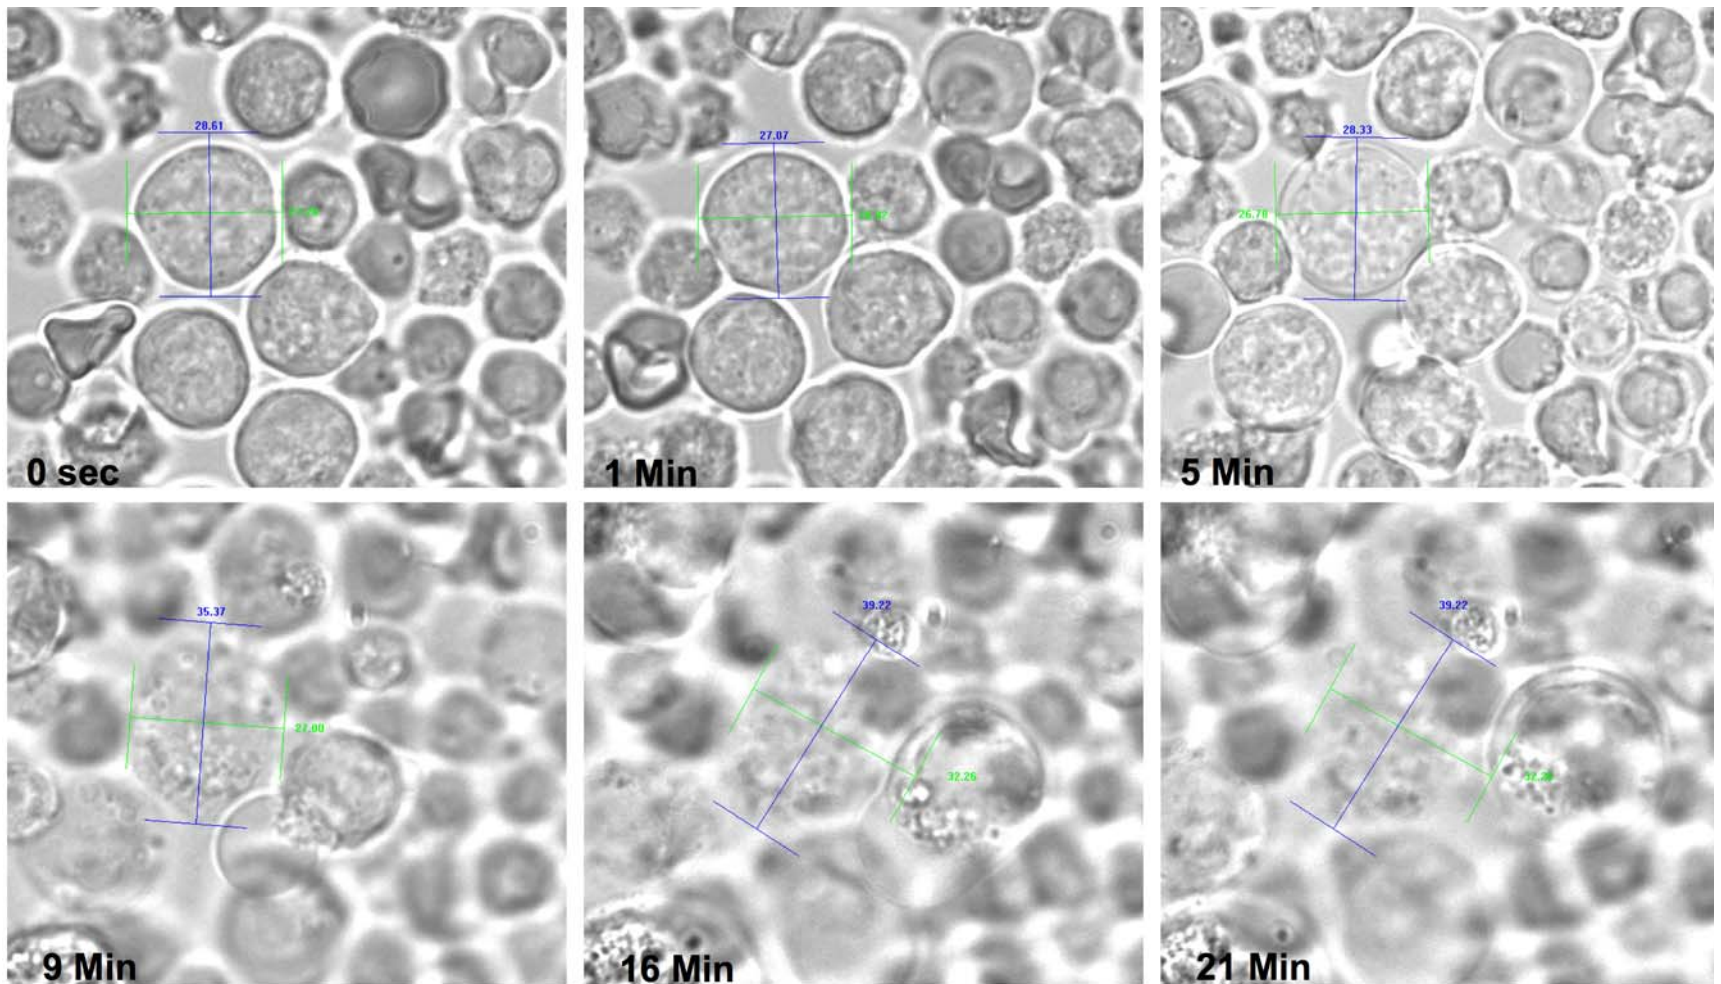

**SF5. MK cell size measurement during endomitosis.**

Size measurements in micrometers of the high ploidy MK (8N) depicted in Figure 2B-ii were obtained at various time points using the calipers tools of Metamorph software. Original magnification 900X.

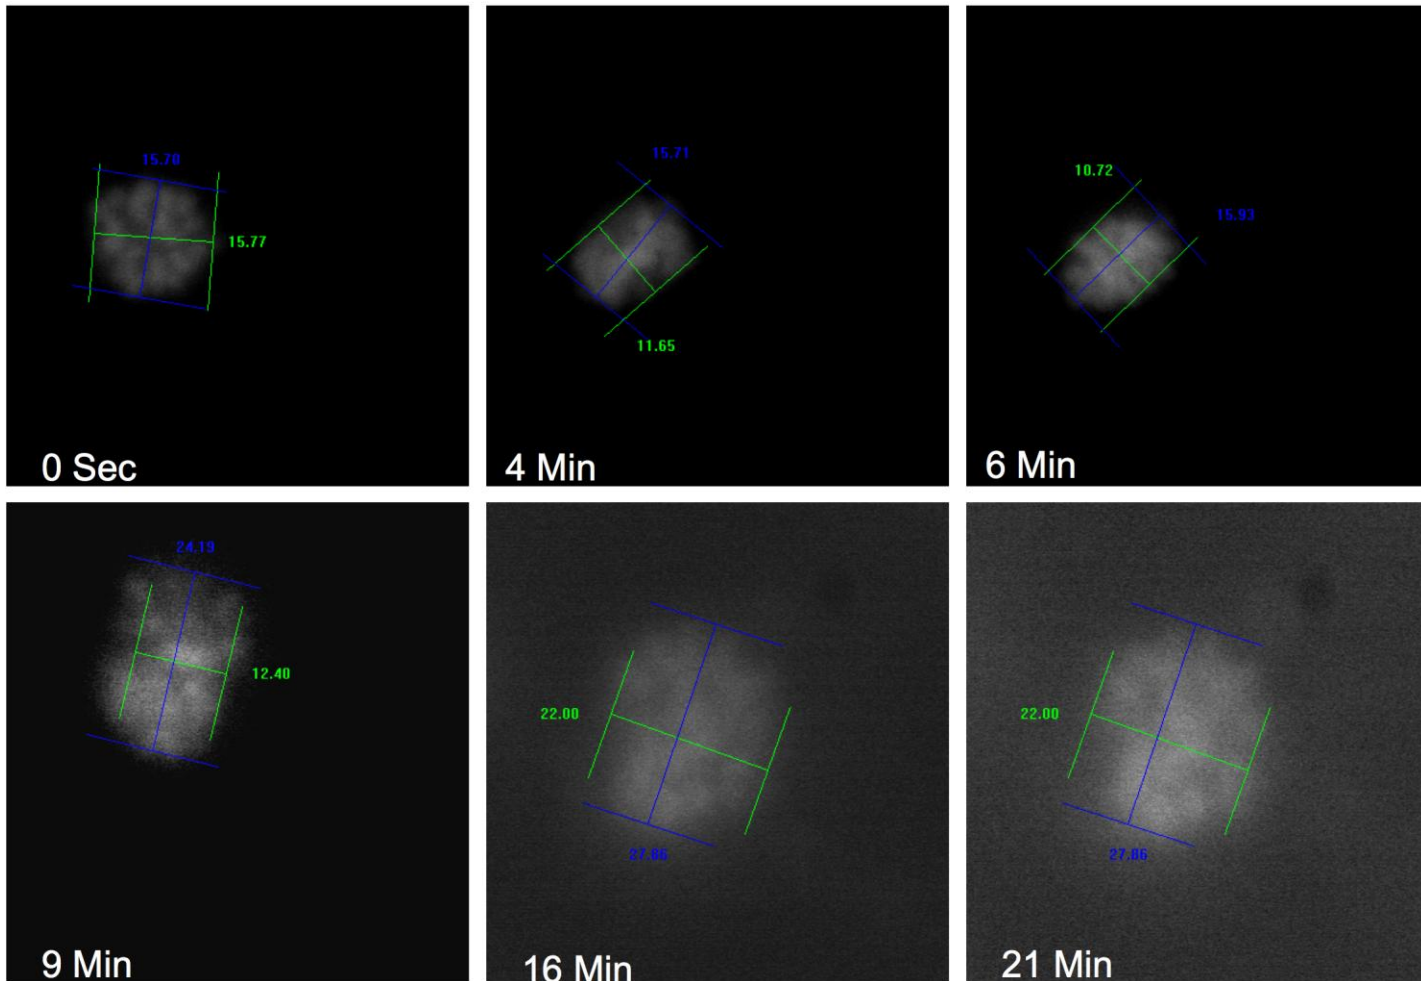

**SF6. Changes in chromosomal measurements during endomitosis.**

Size measurements of chromosomal content (in micrometers) of the high ploidy MK (8N) depicted in Figure 2B-ii were obtained at various time points using the calipers tools of Metamorph software. Original magnification 900X.

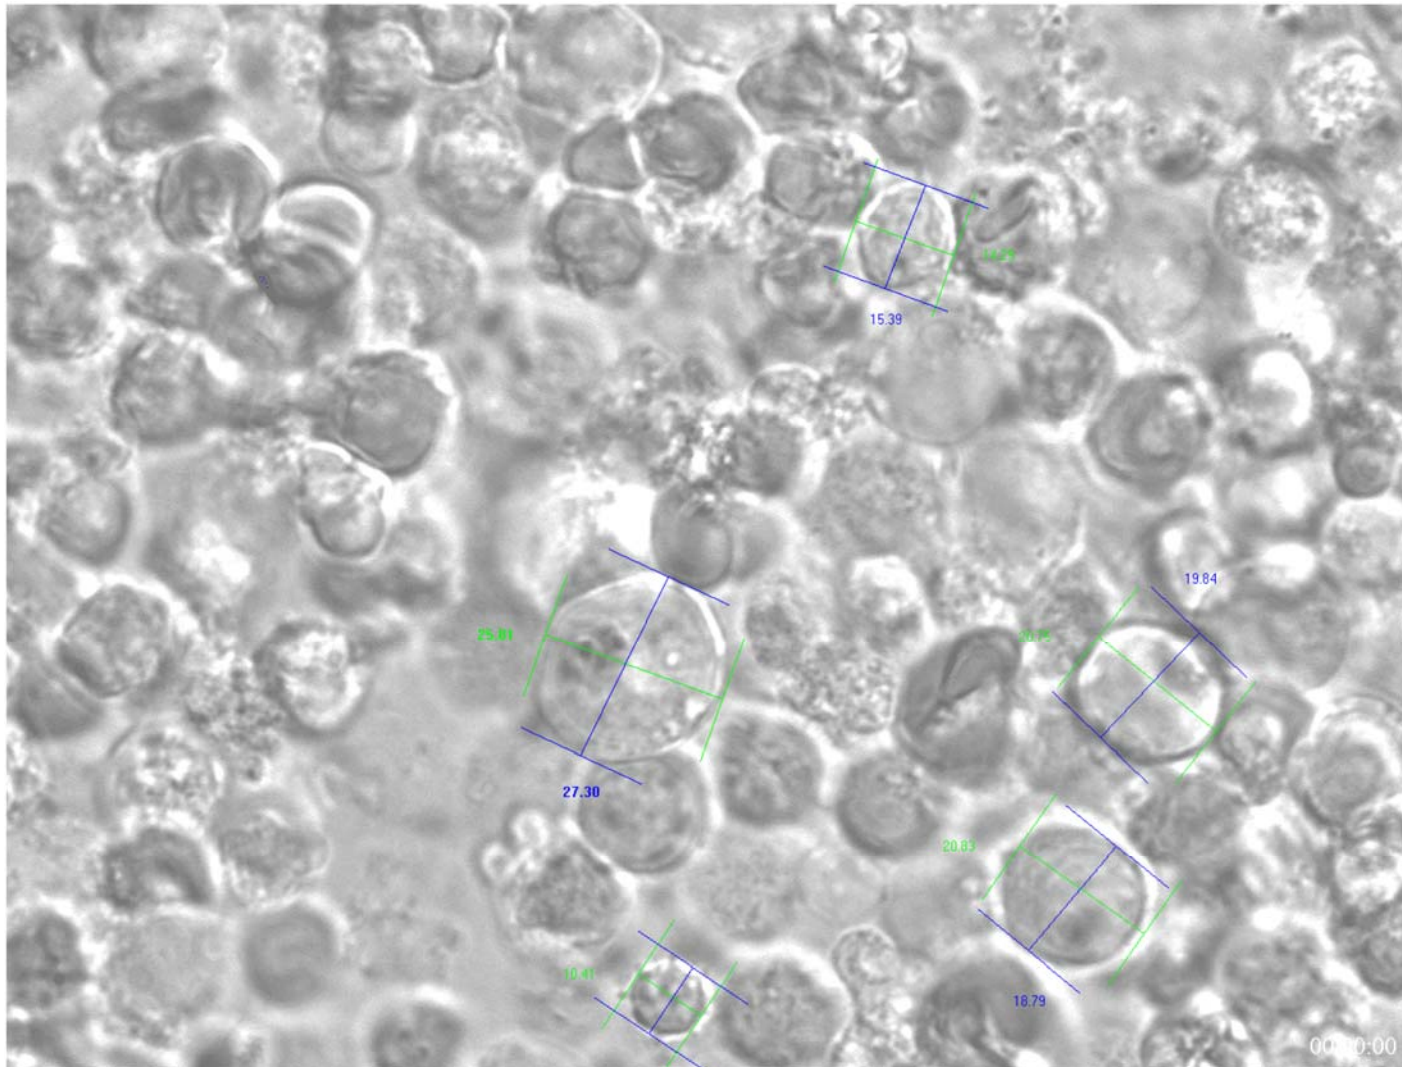

**SF7. Representative measurements of diploid cells.**

Representative brightfield measurements of cells surrounding the MK depicted in Figure 2A-i were obtained using calipers tools of metamorph software. Measurements are in micrometers and the original magnification is 900X.

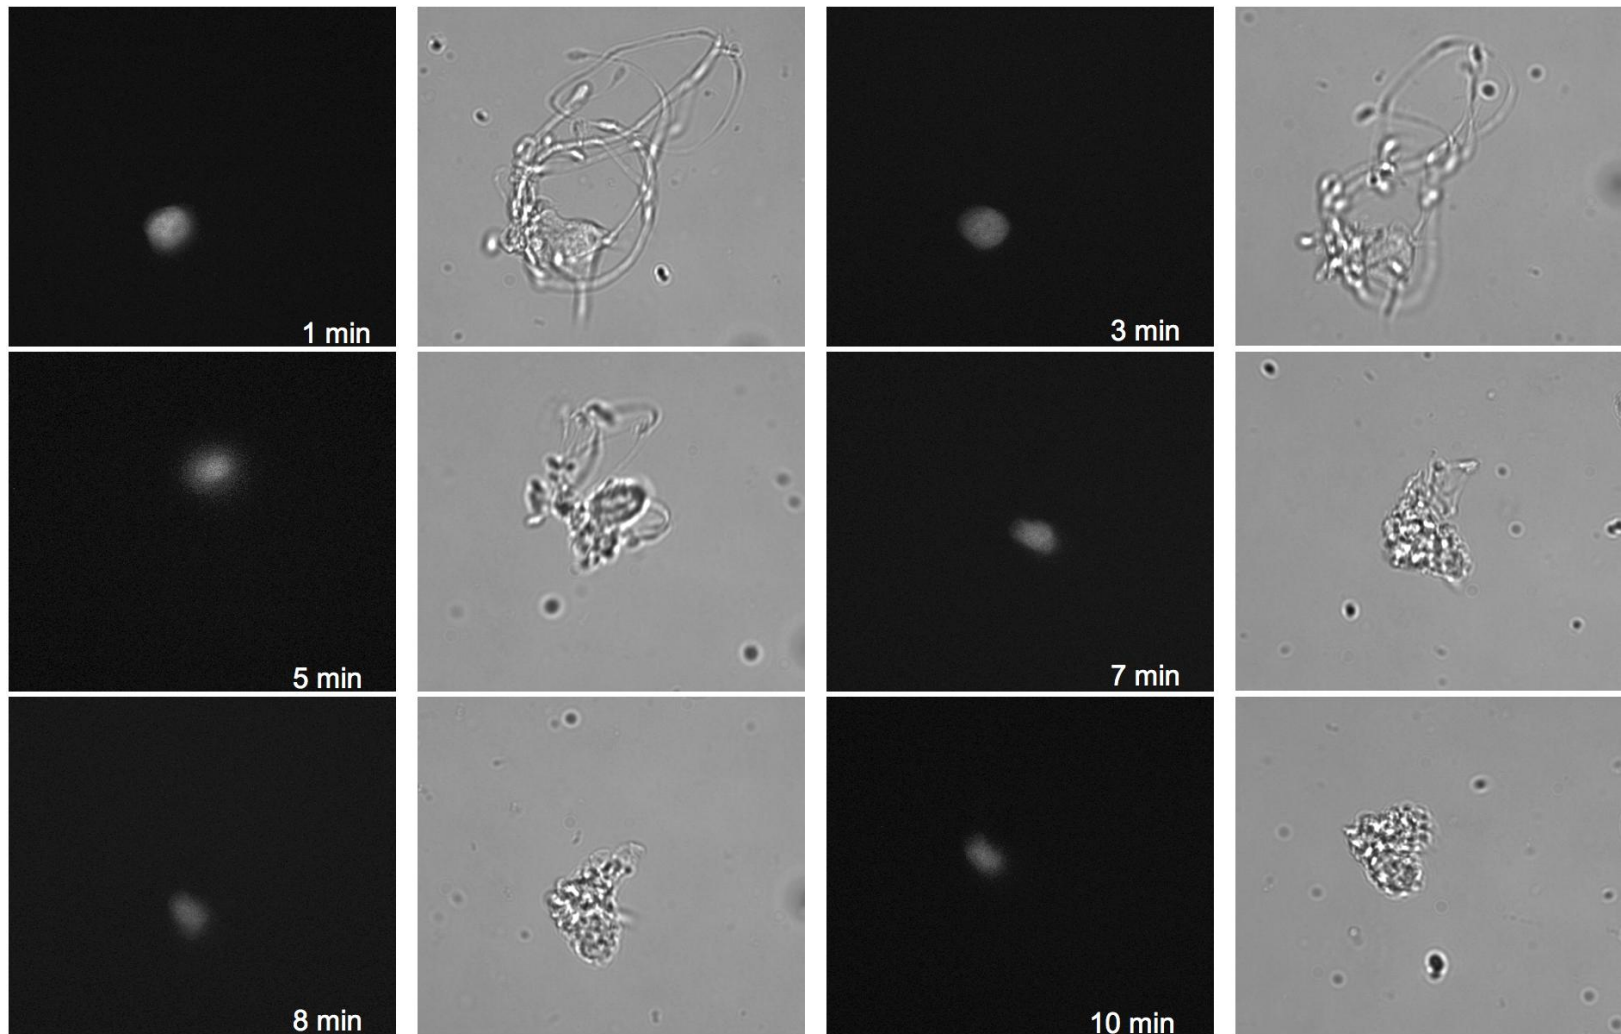

### **SF8. Platelet fragmentation.**

A fetal liver-derived H2B-GFP MK with multiple proplatelet formations was captured, both in brightfield and fluorescence phase microscopy, during the last stages of its fragmentation. Original magnification 600X.
